# Supplementary material for: NAC transcription factors ATAF1 and ANAC055 affect the heat stress response in Arabidopsis
Source: PubMed Central journal article supplement (PMC9253118; doi:10.1038/s41598-022-14429-x), 2022-07-04
Supplement: 41598_2022_14429_MOESM3_ESM.pdf [file 41598_2022_14429_MOESM3_ESM.pdf]

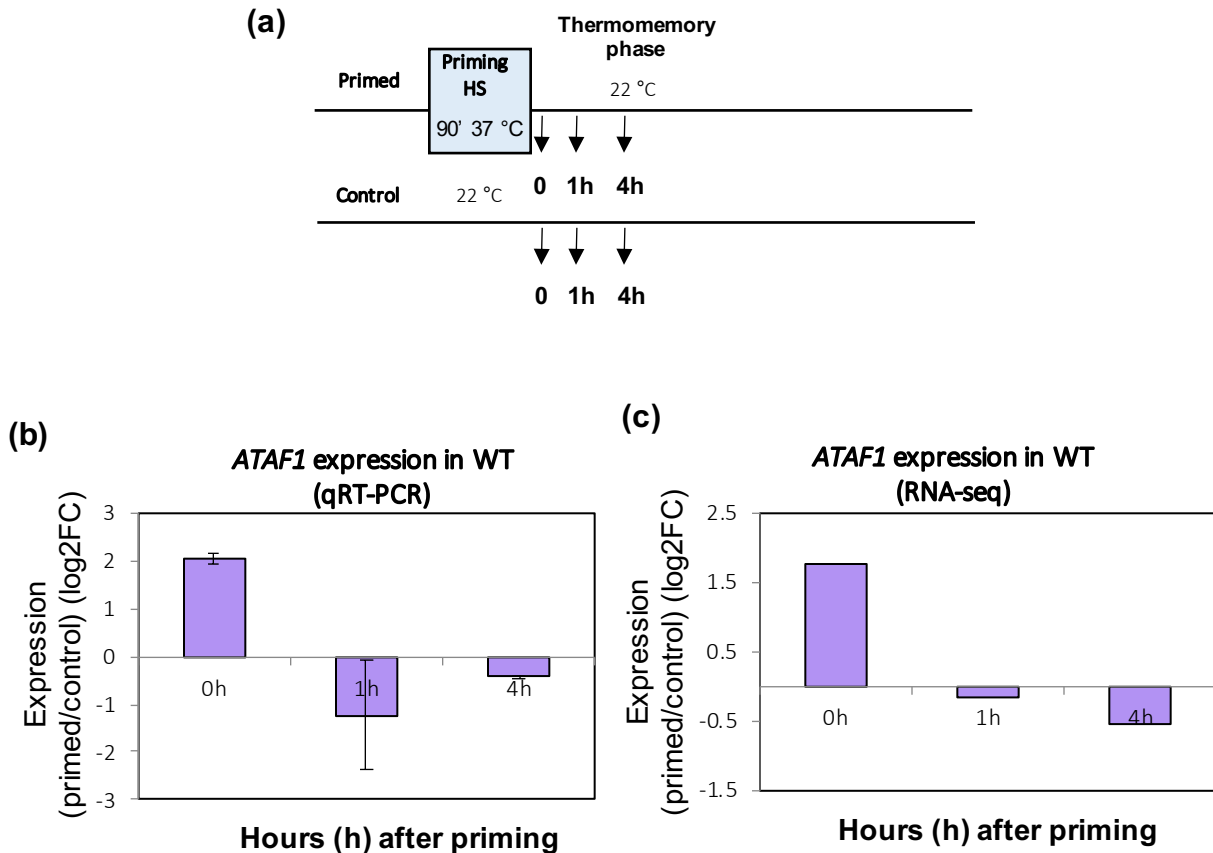

**Supplementary Figure S3. Confirmation of *ATAF1* expression in WT plants after priming treatment using qRT-PCR and RNA-seq.**

(a) Schematic representation of the heat stress (HS) regime applied to assess *ATAF1* expression in response to priming. (b) Expression data from qRT-PCR. Expression is shown as log<sub>2</sub>-fold change between HS and control. (c) Expression data from RNA-seq analyses.
