# Supplementary material for: NAC transcription factors ATAF1 and ANAC055 affect the heat stress response in Arabidopsis
Source: Sci Rep. 2022 Jul 4;12:11264. doi: 10.1038/s41598-022-14429-x (PMC9253118; doi:10.1038/s41598-022-14429-x)
Supplement: Supplementary file 6 — Supplementary Table S2. [file 41598_2022_14429_MOESM6_ESM.xlsx]

## Sheet: expression after priming_acq
Supplementry Table (1, a): Expression of NACs after priming treatment (37oC, 90min) in acquired thermotolerance (73 genes).
GENE LOCUS	0min after 37	30min after 37	60min after 37	90min after 37
AT1G01010	-1.913	1.054	1.836	2.586
AT1g01720	2.058	-0.021	-0.408	-1.779
AT1G02220	-1.092	0.968	1.624	-0.895
AT1G12260	-1.586	-2.104	0.924	-0.973
AT1G25580	-1.05	-0.761	0.67	-0.384
AT1G28470	-0.859	-0.534	0.514	-0.98
AT1G32870	2.722	2.325	1.349	-0.99
AT1G33060	-1.817	0.947	0.925	1.422
AT1G33280	-1.918	-1.608	-1.474	-0.875
AT1G34180	-1.047	-1.025	1.447	-1.031
AT1G34190	-0.169	-0.396	0.451	0.336
AT1G52880	0.678	1.103	0.42	-2.988
AT1G52890	-1.761	-1.675	-1.459	0.726
AT1G54330	-1.516	-2.03	-0.771	-0.616
AT1G56010	-2.012	-1.337	0.726	-0.322
AT1G65910	-1.573	-2.19	0.154	-1.142
AT1G69490	0.621	-2.705	0.651	0.937
AT1G71930	-2.482	-0.404	-1.994	-0.063
AT1G77450	0.946	0.751	0.243	0.399
AT1G79580	-3.082	-2.06	-0.525	-1.328
AT2G02450	-0.829	-1.481	0.854	-0.321
AT2G17040	1.477	-1.045	1.655	-1.146
AT2G18060	-1.605	1.347	1.488	-1.031
AT2G24430	NR	-0.511	1.223	0.114
AT2G33480	-1.674	-0.525	-0.315	-0.235
AT2G43000	-1.964	-1.005	-0.303	-0.232
AT2G46770	-2.678	-1.554	-2.116	-0.113
AT3G01600	1.457	2.595	1.254	-2.036
AT3G04060	0.707	0.657	-0.1	0.503
AT3G04070	-1.17	0.463	0.772	0.78
AT3G04420	-2.055	-1.491	1.11	0.729
AT3G10480	-0.079	-0.718	1.12	-0.402
AT3G10490	-0.158	1.355	1.165	0.218
AT3G15500	1.364	-0.119	-0.99	0.83
AT3G15510	0.635	1.08	0.986	2.734
AT3G17730	-1.64	-0.979	0.061	-0.779
AT3G18400	0.511	NR	1.047	-0.216
AT3G29035	-1.898	-1.384	-0.565	-0.262
AT3G44290	0.1	-2.151	0.197	-1.106
AT3G49530	0.586	-0.741	0.343	-1.132
AT4G01540	-1.291	-0.999	0.978	-0.993
AT4G10350	-1.443	-1.907	-0.983	-0.674
AT4G17980	-3.555	0.611	1.201	-0.519
AT4G27410	1.524	-0.819	0.37	0.103
AT4G28500	-0.248	0.343	-0.285	-0.614
AT4G35580	-0.36	1.151	0.838	-0.226
AT4G36160	-1.215	-1.852	0.054	-0.55
AT5G04400	-2.991	-1.267	-2.233	1.395
AT5G04410	1.914	0.924	0.48	-0.729
AT5G07680	-0.988	1.391	1.396	-0.851
AT5G08790	-0.459	-1.024	-0.86	-1.73
AT5G17260	-1.049	-1.056	-0.274	-0.862
AT5G18270	1.197	1.031	-0.644	-2.057
AT5G18300	-0.893	-0.602	-1.844	4.397
AT5G22290	-0.226	1.057	1.079	-0.2
AT5G24590	1.221	0.933	0.735	-1.137
AT5G39610	-1.063	-1.433	0.191	0.963
AT5G39690	0.934	1.015	0.935	2.106
AT5G46590	-1.765	-1.31	-2.122	-0.664
AT5G53950	-0.338	1.296	1.464	0.199
AT5G56620	-0.911	NR	1.123	-0.465
AT5G62380	-1.67	NR	0.987	-0.935
AT5G64060	-1.48	1.234	2.223	1.104
AT5G64530	-2.003	-1.184	-0.642	1.669
AT5G66300	-2.204	0.822	0.793	0.559
AT3G56560	3.302	1.799	2.115	-2.35
AT3G15170	-1.318	NR	1.054	-0.4
AT5G39820	-1.222	NR	0.863	2.3
AT1G02230	NR	-2.74	NR	NR
AT1G62700	NR	NR	0.804	-0.761
AT2G27300	-0.6	-1.409	NR	-0.777
AT3G44350	-1.384	0.314	NR	NR
AT5G14490	NR	NR	1.494	NR

## Sheet: clusters_memory_72 genes 
Supplementry Table S2 : Expression of NACs after triggering stimulus.
	Gene Name	0h_unP	0.5h_unP	1h_unP	2h_unP	4h_unP	24h_unP	0h_P	0.5h_P	1h_P	2h_P	4h_P	24h_P
AT2G17040	NAC036	1.20304	1.26119	0.761293	-0.882772	1.38551	0.609781	1.37684	1.32123	1.65473	0.776972	0.383028	0.588313	cluster_1
AT3G04070	NAC047	-0.722998	-0.847427	-0.541489	-4.31111	0.694409	0.631434	0.810266	0.415743	0.886478	3.34483	0.201976	1.32259
AT1G01010	NAC001	-0.040162	-0.24751	-0.649626	-1.56906	-0.133411	0.451922	-0.444173	-1.00934	1.03229	1.3953	0.998701	0.489847
AT1G69490	NAC029_ATNAP	-0.203624	0.952665	0.659424	-2.53912	1.36327	-0.498163	1.77992	1.65166	1.34635	4.65716	0.532969	0.495543
AT1G77450	NAC032	-0.452066	0.052485	0.115552	-2.22034	-0.039869	0.910869	0.211162	-0.414351	-0.25101	1.56329	0.0333227	0.790317
AT3G10490	NAC051_ANAC052	-1.29561	-1.05119	-1.28988	-5.61688	-0.783346	0.399967	0.472846	0.0440973	1.1405	3.98227	0.631969	0.357191
AT3G15500	NAC055_ATNAC3	-0.415612	0.663903	0.827191	-1.17419	0.904485	0.910457	1.33224	1.08277	0.821118	2.22316	0.860686	0.131444
AT3G49530	NAC062_NTL6	-0.516838	-0.625713	-0.29261	-3.76508	0.064136	1.55965	0.403885	0.386026	0.264776	3.15078	0.463582	0.0835543
AT4G27410	NAC072_RD26	-0.116747	-0.199715	0.0624713	-4.86831	0.332944	0.976003	0.690692	0.692645	0.523627	5.10139	0.64275	0.177525
AT4G28500	NAC073_SND2	-1.01047	-0.567993	-0.738361	-3.64905	-0.283123	0.222128	0.607347	0.11821	0.945519	2.25661	0.251767	-0.000812
AT5G04400	NAC077	0.997857	1.60907	-0.180302	-1.53473	2.55808	0.909815	1.09553	-1.05284	2.80984	4.07263	0.109832	-1.97743
AT5G04410	NAC078_NAC2	-0.62426	-0.646049	-0.658861	-2.91613	0.238206	1.80354	-0.0502827	0.0269707	0.225865	1.81949	0.154302	-0.11808
AT5G08790	NAC081_ATAF2	-0.008062	0.348945	0.362021	-2.44829	0.242963	1.81788	0.56355	0.32017	0.805358	2.094	0.553332	0.540641
AT5G39690	NAC093	0.167572	0.681617	0.971523	-0.0583863	-0.643989	0.792162	-0.44018	-0.717395	1.25751	3.31716	-0.191959	-0.92029
		0h_unP	0.5h_unP	1h_unP	2h_unP	4h_unP	24h_unP	0h_P	0.5h_P	1h_P	2h_P	4h_P	24h_P
AT1G33280	NAC015_BRN1	-1.16372	-1.11538	-1.07955	1.1336	-0.853096	-0.895638	0.983667	0.498345	-0.116588	-1.69983	0.701269	-0.435936	cluster_2
AT2G27300	NAC040_NTL8	-0.854202	-1.52187	-1.73301	-0.020504	-0.75633	2.65455	0.389654	0.531139	1.12218	-3.50361	-0.602226	-1.23896
AT5G14490	NAC085	-8.10769	-1.43508	-2.38748	2.11492	-2.35638	3.51328	7.70452	1.0405	0.887394	-4.44303	2.58051	1.44924
AT1G34180	NAC016	-1.03174	-0.83628	-0.254083	-0.248028	-0.118108	1.47369	0.708016	0.104253	0.221407	-1.38344	0.70523	0.53463
AT1G71930	NAC030_VND7	-0.495055	-0.897491	-0.050552	0.708592	-0.387811	0.224984	0.268084	-0.00828	0.58055	-2.02173	-0.211587	0.597734
AT3G03200	NAC045	-1.05809	-1.03759	-0.820399	0.288939	0.069762	1.01644	0.694139	0.671718	1.07777	-2.03634	0.0853453	-0.322329
AT5G66300	NAC105_VND3	-1.81752	-1.17678	-1.02211	1.85996	-0.902234	-0.840086	0.659813	0.374487	0.204007	-3.60447	-0.276159	0.150699
		0h_unP	0.5h_unP	1h_unP	2h_unP	4h_unP	24h_unP	0h_P	0.5h_P	1h_P	2h_P	4h_P	24h_P
AT4G10350	NAC070_BRN2	-1.06219	-1.65969	-1.6198	1.13501	-0.717075	-1.5682	0.128449	1.27179	1.14266	-2.31972	0.19442	-0.556747	cluster_3
AT5G39820	NAC094	-0.928756	-3.25676	0.037901	1.14455	2.08288	0.270244	-0.921976	3.28716	0.456895	-0.393292	-0.594887	-0.626627
AT5G64530	NAC104_XND1	-0.550118	-0.49873	-0.143668	2.84	0.1977	-0.15099	0.401833	0.730152	0.641584	-3.2838	0.114109	0.567893
AT4G17980	NAC071	-0.580812	-5.98356	-0.063405	0.0185123	-0.379488	0.842741	-1.61664	3.16257	2.48249	-3.1393	-0.968667	0.702295
		0h_unP	0.5h_unP	1h_unP	2h_unP	4h_unP	24h_unP	0h_P	0.5h_P	1h_P	2h_P	4h_P	24h_P
AT3G56560	NAC065	2.21344	-1.93491	0.222178	0.353356	0.921708	4.86951	-2.91862	1.7076	1.97909	1.84316	1.94559	-0.777534	cluster_4
AT1g01720	NAC002_ATAF1	1.69923	1.85316	2.15366	1	2.13088	2.57928	0.0429963	-0.39031	-0.264392	0.176283	0.064479	-0.444849
AT5G18300	NAC088	2.82579	1.39831	0.362556	1.35822	0.428344	2.65924	1.49028	-0.361827	-1.51357	2.50642	-1.01549	-1.43401
		0h_unP	0.5h_unP	1h_unP	2h_unP	4h_unP	24h_unP	0h_P	0.5h_P	1h_P	2h_P	4h_P	24h_P
AT1G56010	NAC022_NAC1	-4.20058	-3.74067	-3.64531	-5.57004	-3.42832	-2.23949	0.679146	0.505407	0.530201	-1.80914	0.772497	1.69444	cluster_5
AT1G02220	NAC003	-0.88406	-1.03927	-0.613251	-3.4336	-0.294126	0.554432	0.980506	0.395282	0.623968	-1.11314	0.616764	0.261909
AT5G46590	NAC096	-1.12761	-1.38916	-0.638335	-4.08838	-1.66163	0.974904	-0.151633	0.695621	-0.248477	-0.778651	0.369809	1.31893
		0h_unP	0.5h_unP	1h_unP	2h_unP	4h_unP	24h_unP	0h_P	0.5h_P	1h_P	2h_P	4h_P	24h_P
AT2G02450	NAC034_ANAC035_LOV1	-1.55776	-2.06477	-2.08011	-4.58124	-0.564149	-0.102649	1.10909	0.746886	2.44069	1.79871	0.73553	1.33147	cluster_6
AT5G07680	NAC079_ANAC080_ATNAC4	-1.4517	-1.42686	-1.3952	-5.45556	-1.5266	-0.331012	0.323621	0.246808	0.870256	3.00804	0.89653	0.994555
AT1G28470	NAC010_SND3	-1.50979	-1.98938	-0.782426	-3.99535	-1.03578	0.672063	1.54645	0.880281	1.17012	3.25104	1.18683	0.660157
AT1G34190	NAC017	-1.32851	-1.12874	-1.21704	-2.89279	-0.726641	0.266763	0.065771	-0.131849	0.214668	1.18762	0.032685	0.516868
AT1G52880	NAC018_ATNAM_NARS2	-1.14385	-1.32714	-1.02251	-2.8026	-0.716249	0.997098	0.662916	0.233974	0.72208	1.2622	0.762558	0.154194
AT1G54330	NAC020	-1.54022	-0.994834	-1.41806	-2.6935	-0.703549	0.4282	0.200207	0.360437	1.16548	0.645992	-0.190615	0.275268
AT2G33480	NAC041	-1.22657	-1.87113	-2.28202	-4.34342	-1.65781	-0.0731137	1.14474	1.14286	1.68051	1.92368	1.16404	2.02631
AT3G29035	NAC059_ATNAC3_ORS1	-0.667805	-1.21064	-0.965752	-3.23992	-0.310872	-0.620966	0.816415	1.09881	1.00346	2.14691	0.756375	1.51995
AT5G39610	NAC092_ATNAC2_ATNAC6_ORE1	-3.01415	-2.02452	-1.96837	-4.70954	-0.858295	-0.602467	0.212025	-0.356483	0.465758	2.49954	-0.412906	1.91151
AT1G25580	NAC008_SOG1	-0.830116	-0.859847	-1.03619	-1.86892	-0.229474	0.152431	0.565172	-0.29616	0.781698	0.409446	0.41347	0.187837
AT3G18400	NAC058	-0.650519	-0.316631	-0.298745	-2.51687	-0.39571	0.185876	0.765131	0.155101	0.568811	1.07252	0.757032	0.776603
		0h_unP	0.5h_unP	1h_unP	2h_unP	4h_unP	24h_unP	0h_P	0.5h_P	1h_P	2h_P	4h_P	24h_P
AT3G10500	NAC053_NTL4	-1.02514	-1.40881	-0.771869	-1.04256	-0.666271	-1.33523	0.505382	0.435558	0.851938	-0.628079	0.311834	2.93471	cluster_7
AT5G53950	NAC098_ATCUC2	-4.7702	-5.15034	-4.65332	-4.80422	-5.08732	-1.27943	0.191819	-1.36103	1.2007	0.713768	0.966061	2.66257
AT2G24430	NAC038_ANAC039	-2.01314	-1.87808	-2.52286	-0.973111	-1.3971	0.487123	1.00174	0.246502	1.61007	-0.780811	0.905624	1.04729
AT3G15510	NAC056_ATNAC2_NARS1	-1.75239	-1.2363	-1.28555	-0.97622	-1.35205	0.344063	0.967793	0.522242	1.06401	-0.639576	0.969003	1.1128
AT4G01540	NAC068_NTM1	-2.03727	-1.69875	-2.62421	-2.62429	-1.23409	1.17185	1.48873	0.222576	1.5991	-0.457592	0.997606	1.19782
AT3G01600	NAC044	-1.78558	-0.982039	-0.967128	-0.57008	-0.976328	0.271752	0.280659	-0.543654	0.341381	-1.0822	0.598421	0.992306
		0h_unP	0.5h_unP	1h_unP	2h_unP	4h_unP	24h_unP	0h_P	0.5h_P	1h_P	2h_P	4h_P	24h_P
AT2G18060	NAC037_VND1	-1.56809	-4.21652	-2.86557	-2.09968	-0.929055	-0.17592	0.897273	2.65024	1.97229	-0.362913	0.363681	1.3412	cluster_8
AT3G44290	NAC060	-1.47399	-4.3219	-4.42287	0.295598	-3.31382	0.586916	0.603985	2.58165	3.33366	-1.45555	2.57413	0.49725
AT4G36160	NAC076_VND2	-1.52804	-2.02567	-2.27391	0.005469	-1.30998	-0.745831	1.33041	1.40665	2.49304	-3.1978	1.45349	1.92843
AT5G62380	NAC101_VND6	-1.49477	-1.3017	-0.831082	0.0211567	-1.54975	0.442128	0.953129	1.44077	1.28911	-1.46282	1.40696	0.512689
AT1G79580	NAC033_SMBURP7	-1.24461	-2.37224	-2.20743	-1.37635	-1.32072	-1.17946	0.210176	0.5869	1.66425	-0.962857	0.529825	-0.309432
AT2G43000	NAC042_JUB1	-1.13138	-1.79853	-1.48194	0.130655	-1.55382	-0.741849	0.898905	1.11858	0.905984	-2.40514	1.46384	0.285388
AT3G04420	NAC048	-0.656878	-1.67827	-2.2856	-0.712275	-0.505464	1.38566	0.397261	0.959497	1.40531	-2.43212	0.773018	0.552456
AT3G17730	NAC057	-1.87955	-2.08922	-1.87084	-0.487761	-1.52255	-0.445703	1.00796	0.5297	0.875904	-2.1864	0.715842	0.541248
AT1G52890	NAC019	-1.03707	-1.41878	-3.67172	0.145031	0.80854	3.8329	1.37868	1.58921	4.29798	-0.307414	1.04869	-1.23523
AT2G46770	NAC043_NST1	-1.98095	-2.33255	-2.67014	0.562793	-0.703527	-0.557433	1.09187	-0.0280333	2.01344	-0.878384	-0.436238	1.12946
		0h_unP	0.5h_unP	1h_unP	2h_unP	4h_unP	24h_unP	0h_P	0.5h_P	1h_P	2h_P	4h_P	24h_P
AT1G62700	NAC026_VND5	-0.687479	-3.74388	-2.28521	-2.53653	-2.42899	0.182391	0.395589	0.231318	1.89497	-1.83728	-0.406297	1.36397	cluster_9
AT5G24590	NAC091_TIP	-0.802555	-0.607799	-0.573415	-0.716359	-0.044387	1.10347	0.296569	0.210832	0.427069	-0.359607	0.289269	0.255504
AT5G64060	NAC103	-2.41946	-1.8034	-1.634	-2.04158	-1.81538	2.59944	0.296262	-0.252497	0.166792	-1.04871	0.430139	1.01181
AT1G32870	ANAC13	-1.22347	-1.77499	-1.58119	-1.91097	-0.643349	2.94453	1.11214	1.01912	1.39893	0.38791	1.60715	1.03987
AT1G65910	NAC028	-1.35831	-2.88615	-1.77987	-1.6746	-3.71517	0.639304	0.089085	1.41169	0.488614	-1.75818	2.95132	0.641616
AT3G10480	NAC050	-0.571624	-0.578488	-0.869383	-1.24849	-0.292517	0.839825	0.661145	0.0958173	0.6483	-0.310148	0.234396	0.575864
AT5G18270	NAC087	-1.19748	-0.938373	-0.605572	-0.622706	-0.974911	1.17403	0.361171	0.213036	0.333766	-0.488909	0.758798	0.20959
AT5G22290	NAC089_FSQ6	-0.390423	0.172964	-0.715811	-0.265924	0.541707	2.51621	0.513495	0.370687	0.660062	-0.504965	0.620884	0.327591
		0h_unP	0.5h_unP	1h_unP	2h_unP	4h_unP	24h_unP	0h_P	0.5h_P	1h_P	2h_P	4h_P	24h_P
AT5G56620	NAC099	-3.35541	-1.96838	-1.89633	-1.7264	-0.809349	-0.77781	3.96326	0.756556	2.19189	0.106819	1.30375	1.47086	cluster_10
AT1G12260	NAC007_EMB2749_VND4	-2.7761	-3.04798	-2.66303	-4.30762	-2.15422	-0.305404	2.00427	1.01686	1.12603	1.30979	1.10423	1.11787
AT5G17260	NAC086	-2.9178	-1.76281	-2.04025	-2.36337	-0.813745	0.038829	0.421461	-0.448655	1.77045	0.468427	1.09615	-1.64654
AT3G04060	NAC046	-1.31577	-1.44097	-0.811097	-1.62941	-0.550563	1.09518	0.556176	0.393245	0.457086	0.579254	0.863673	-0.37058
AT4G35580	CBN_ACNTL9	-1.13712	-1.04895	-1.20962	-1.11061	-0.353226	0.463029	0.717571	0.606758	0.837202	0.0471183	0.604058	0.474273
AT1G33060	NAC014	-1.24973	-1.1178	-1.4826	-1.29395	-0.341006	-0.0516933	0.773873	1.01135	1.25984	-0.0129083	0.646752	0.754568
